# Neurology<sup>®</sup>

Volume 69, Number 24, December 11, 2007, Supplement 3  
www.neurology.org

THE MOST WIDELY READ AND HIGHLY CITED PEER-REVIEWED  
NEUROLOGY JOURNAL

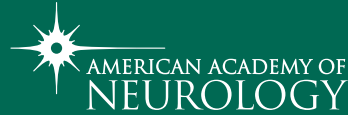

## INTRODUCTION

- S1 The evidence-based rationale for monotherapy in appropriate patients with epilepsy  
*Rajesh Sachdeo*

## ARTICLES

- S3 Monotherapy in adults and elderly persons  
*Edward Faught*
- S10 Importance of monotherapy in women across the reproductive cycle  
*Georgia Montouris*

- S17 Monotherapy in children and infants  
*Angus A. Wilfong*
- S23 Monotherapy clinical trial design  
*Rajesh Sachdeo*
- S28 Animal model studies application to human patients  
*Gregory L. Holmes*

This supplement was supported by an educational grant from Novartis Pharmaceuticals Corporation. ProCom contributed to the editorial refinement and production of this supplement.
